# Supplementary material for: Calculated Whole Blood Viscosity and Albumin/Fibrinogen Ratio in Patients with a New Diagnosis of Multiple Myeloma: Relationships with Some Prognostic Predictors
Source: MDPI journal article supplement (doi:10.3390/biomedicines11030964), 2023-03-21
Supplement: s1 [file s1]

**Table S1:** Medians of the prognostic factors in whole cohort of patients and in the different isotypes of MM.

| <b>Medians</b>  | <b>All MM<br/>(n=190)</b> | <b>LCMM<br/>(n=27)</b> | <b>IgA<br/>(n=56)</b> | <b>IgG<br/>(n=107)</b> |
|-----------------|---------------------------|------------------------|-----------------------|------------------------|
| Albumin (g/L)   | 36.70                     | 39.90                  | 33.85                 | 37.00                  |
| Beta2-MG (mg/L) | 4.70                      | 4.40                   | 4.90                  | 4.70                   |
| RDW%            | 15.1                      | 14.4                   | 16.0                  | 14.8                   |
| BMPC%           | 40                        | 40                     | 60                    | 30                     |

MM = multiple myeloma; LCMM= Light chain multiple myeloma; Beta2-MG = Beta2-microglobulin;  
RDW = Red blood cells distribution width; BMPC = bone marrow plasma cell.

**Table S2:** Medians (IQR) of hemorheological determinants in the different isotypes of MM patients subdivided according to the median of albumin.

| <b>A)</b><br><b>LCMM (n=27)</b>        | <b>albumin &lt; median</b><br><b>(n=12)</b> | <b>albumin ≥ median</b><br><b>(n=15)</b> | <b><i>p</i></b> |
|----------------------------------------|---------------------------------------------|------------------------------------------|-----------------|
| Ht %                                   | 30.50 (6.75)                                | 37.80 (12.80)                            | 0.1001          |
| Total plasma proteins (g/L)            | 61.65 (7.75)                                | 66.50 (4.20)                             | 0.0073          |
| cWBV 208 sec <sup>-1</sup> (mPa · sec) | 13.58 (1.67)                                | 14.98 (2.12)                             | 0.0053          |
| Fibrinogen (g/L)                       | 3.770 (1.373)                               | 3.680 (2.000)                            | 0.6929          |
| Albumin (g/L)                          | 37.05 (6.18)                                | 42.30 (2.30)                             | <0.0001         |
| Albumin/Fibrinogen ratio               | 10.47 (4.504)                               | 11.51 (6.618)                            | 0.1168          |
| <b>B)</b><br><b>IgA MM (n=56)</b>      | <b>albumin &lt; median</b><br><b>(n=28)</b> | <b>albumin ≥ median</b><br><b>(n=28)</b> | <b><i>p</i></b> |
| Ht %                                   | 29.05 (8.75)                                | 31.40 (8.70)                             | 0.0320          |
| Total plasma proteins (g/L)            | 98.35 (28.45)                               | 73.25 (13.85)                            | 0.0019          |
| cWBV 208 sec <sup>-1</sup> (mPa · sec) | 19.36 (5.34)                                | 15.96 (3.44)                             | 0.0040          |
| Fibrinogen (g/L)                       | 3.015 (1.968)                               | 2.825 (1.283)                            | 0.5072          |
| Albumin (g/L)                          | 28.65 (5.17)                                | 37.00 (3.95)                             | <0.0001         |
| Albumin/Fibrinogen ratio               | 9.451 (5.251)                               | 13.31 (8.480)                            | 0.0011          |
| <b>C)</b><br><b>IgG MM (n=107)</b>     | <b>albumin &lt; median</b><br><b>(n=53)</b> | <b>albumin ≥ median</b><br><b>(n=54)</b> | <b><i>p</i></b> |
| Ht %                                   | 29.10 (7.15)                                | 33.85 (7.33)                             | <0.0001         |
| Total plasma proteins (g/L)            | 80.00 (27.90)                               | 82.20 (19.23)                            | 0.9197          |
| cWBV 208 sec <sup>-1</sup> (mPa · sec) | 17.27 (4.58)                                | 17.95 (3.29)                             | 0.4515          |
| Fibrinogen (g/L)                       | 3.200 (1.790)                               | 3.150 (1.360)                            | 0.4440          |
| Albumin (g/L)                          | 29.70 (6.15)                                | 39.85 (3.32)                             | <0.0001         |
| Albumin/Fibrinogen ratio               | 8.81 (3.74)                                 | 12.76 (6.35)                             | <0.0001         |

IQR = interquartile range; MM = multiple myeloma; Ht = hematocrit; cWBV = calculated whole-blood viscosity.

**Table S3:** Medians (IQR) of hemorheological determinants in the different MM isotypes subdivided according to the median of Beta2-MG.

| <b>A)</b><br><b>LCMM (n=27)</b>        | <b>Beta2-MG &lt; median</b><br><b>(n=13)</b> | <b>Beta2-MG ≥ median</b><br><b>(n=14)</b> | <b>p</b> |
|----------------------------------------|----------------------------------------------|-------------------------------------------|----------|
| Ht %                                   | 38.30 (9.90)                                 | 27.90 (8.37)                              | 0.0041   |
| Total plasma proteins (g/L)            | 63.90 (6.90)                                 | 64.30 (4.67)                              | 0.8195   |
| cWBV 208 sec <sup>-1</sup> (mPa · sec) | 15.24 (2.63)                                 | 13.93 (1.66)                              | 0.1279   |
| Fibrinogen (g/L)                       | 3.220 (1.210)                                | 4.270 (1.717)                             | 0.2339   |
| Albumin (g/L)                          | 41.60 (7.45)                                 | 39.90 (3.95)                              | 0.5419   |
| Albumin/Fibrinogen ratio               | 11.51 (3.348)                                | 9.25 (4.439)                              | 0.2535   |
| <b>B)</b><br><b>IgA MM (n=56)</b>      | <b>Beta2-MG &lt; median</b><br><b>(n=28)</b> | <b>Beta2-MG ≥ median</b><br><b>(n=28)</b> | <b>p</b> |
| Ht %                                   | 32.85 (6.95)                                 | 29.60 (8.70)                              | 0.1900   |
| Total plasma proteins (g/L)            | 77.10 (29.20)                                | 87.30 (32.30)                             | 0.2352   |
| cWBV 208 sec <sup>-1</sup> (mPa · sec) | 16.77 (4.17)                                 | 18.13 (4.44)                              | 0.3343   |
| Fibrinogen (g/L)                       | 2.905 (1.255)                                | 2.870 (1.913)                             | 0.3902   |
| Albumin (g/L)                          | 34.45 (9.25)                                 | 33.60 (9.25)                              | 0.0759   |
| Albumin/Fibrinogen ratio               | 12.90 (6.122)                                | 10.06 (6.153)                             | 0.1069   |
| <b>C)</b><br><b>IgG MM (n=107)</b>     | <b>Beta2-MG &lt; median</b><br><b>(n=53)</b> | <b>Beta2-MG ≥ median</b><br><b>(n=54)</b> | <b>p</b> |
| Ht %                                   | 34.50 (7.80)                                 | 29.65 (5.50)                              | 0.0003   |
| Total plasma proteins (g/L)            | 78.90 (19.30)                                | 86.30 (30.87)                             | 0.0189   |
| cWBV 208 sec <sup>-1</sup> (mPa · sec) | 17.07 (3.66)                                 | 18.27 (5.24)                              | 0.1261   |
| Fibrinogen (g/L)                       | 3.100 (1.045)                                | 3.345 (1.550)                             | 0.1340   |
| Albumin (g/L)                          | 39.20 (8.35)                                 | 33.35 (8.42)                              | <0.0001  |
| Albumin/Fibrinogen ratio               | 12.35 (5.271)                                | 9.349 (4.874)                             | 0.0021   |

IQR = interquartile range; MM = multiple myeloma; Beta2-MG = Beta2-microglobulin; LCMM= Light chain multiple myeloma; Ht = hematocrit; cWBV = calculated whole-blood viscosity.

**Table S4:** Medians (IQR) hemorheological determinants in the different MM isotypes subdivided according to the median of RDW%.

| <b>A)</b><br><b>LCMM (n=27)</b>        | <b>RDW% &lt; median</b><br><b>(n=13)</b> | <b>RDW% ≥ median</b><br><b>(n=14)</b> | <b><i>p</i></b> |
|----------------------------------------|------------------------------------------|---------------------------------------|-----------------|
| Ht %                                   | 38.30 (10.25)                            | 27.90 (8.38)                          | 0.0229          |
| Total plasma proteins (g/L)            | 66.50 (5.60)                             | 64.10 (4.65)                          | 0.4798          |
| cWBV 208 sec <sup>-1</sup> (mPa · sec) | 15.80 (2.57)                             | 13.93 (1.76)                          | 0.0543          |
| Fibrinogen (g/L)                       | 3.650 (1.490)                            | 3.785 (1.800)                         | 0.4505          |
| Albumin (g/L)                          | 42.30 (6.70)                             | 39.50 (4.50)                          | 0.0826          |
| Albumin/Fibrinogen ratio               | 11.30 (6.08)                             | 10.74 (3.989)                         | 0.4369          |
| <b>B)</b><br><b>IgA MM (n=56)</b>      | <b>RDW% &lt; median</b><br><b>(n=28)</b> | <b>RDW% ≥ median</b><br><b>(n=28)</b> | <b><i>p</i></b> |
| Ht %                                   | 33.95 (9.58)                             | 28.80 (6.75)                          | 0.0032          |
| Total plasma proteins (g/L)            | 78.65 (18.60)                            | 90.60 (36.02)                         | 0.2288          |
| cWBV 208 sec <sup>-1</sup> (mPa · sec) | 17.46 (3.38)                             | 18.11 (6.22)                          | 0.4039          |
| Fibrinogen (g/L)                       | 2.995 (1.695)                            | 2.825 (1.465)                         | 0.7916          |
| Albumin (g/L)                          | 36.10 (6.76)                             | 30.25 (8.65)                          | 0.0061          |
| Albumin/Fibrinogen ratio               | 12.80 (6.491)                            | 10.89 (5.787)                         | 0.2179          |
| <b>C)</b><br><b>IgG MM (n=107)</b>     | <b>RDW% &lt; median</b><br><b>(n=52)</b> | <b>RDW% ≥ median</b><br><b>(n=55)</b> | <b><i>p</i></b> |
| Ht %                                   | 35.45 (6.35)                             | 28.70 (5.50)                          | <0.0001         |
| Total plasma proteins (g/L)            | 82.65 (19.90)                            | 80.70 (31.90)                         | 0.4329          |
| cWBV 208 sec <sup>-1</sup> (mPa · sec) | 18.21 (3.57)                             | 17.18 (5.29)                          | 0.7836          |
| Fibrinogen (g/L)                       | 3.105 (1.340)                            | 3.200 (1.340)                         | 0.4798          |
| Albumin (g/L)                          | 38.10 (5.53)                             | 33.00 (11.10)                         | 0.0013          |
| Albumin/Fibrinogen ratio               | 11.00 (5.913)                            | 10.00 (5.899)                         | 0.0205          |

IQR = interquartile range; MM = multiple myeloma; RDW = Red blood cells distribution width; LCMM= Light chain multiple myeloma; Ht = hematocrit; cWBV = calculated whole-blood viscosity.

**Table S5:** Medians (IQR) of hemorheological determinants in the different MM isotypes subdivided according to the median of BMPC%.

| <b>A)</b><br><b>LCMM (n=27)</b>        | <b>BMPC% &lt; median</b><br><b>(n=11)</b> | <b>BMPC% ≥ median</b><br><b>(n=16)</b> | <b><i>p</i></b> |
|----------------------------------------|-------------------------------------------|----------------------------------------|-----------------|
| Ht %                                   | 33.20 (12.70)                             | 30.50 (11.95)                          | 0.2261          |
| Total plasma proteins (g/L)            | 66.50 (7.10)                              | 63.65 (5.65)                           | 0.1073          |
| cWBV 208 sec <sup>-1</sup> (mPa · sec) | 15.17 (1.92)                              | 13.71 (2.03)                           | 0.0501          |
| Fibrinogen (g/L)                       | 3.310 (1.43)                              | 3.965 (1.955)                          | 0.2999          |
| Albumin (g/L)                          | 41.90 (7.70)                              | 39.90 (4.93)                           | 0.2262          |
| Albumin/Fibrinogen ratio               | 11.30 (5.07)                              | 10.24 (5.577)                          | 0.2168          |
| <b>B)</b><br><b>IgA MM (n=56)</b>      | <b>BMPC% &lt; median</b><br><b>(n=26)</b> | <b>BMPC% ≥ median</b><br><b>(n=30)</b> | <b><i>p</i></b> |
| Ht %                                   | 30.35 (9.10)                              | 30.65 (8.77)                           | 0.5166          |
| Total plasma proteins (g/L)            | 78.65 (35.25)                             | 83.30 (25.42)                          | 0.6568          |
| cWBV 208 sec <sup>-1</sup> (mPa · sec) | 17.15 (5.22)                              | 17.71 (4.22)                           | 0.7974          |
| Fibrinogen (g/L)                       | 3.055 (1.510)                             | 2.795 (1.538)                          | 0.3539          |
| Albumin (g/L)                          | 35.15 (9.67)                              | 33.25 (9.85)                           | 0.0899          |
| Albumin/Fibrinogen ratio               | 11.55 (5.802)                             | 12.40 (6.053)                          | 0.7630          |
| <b>C)</b><br><b>IgG MM (n=107)</b>     | <b>BMPC% &lt; median</b><br><b>(n=49)</b> | <b>BMPC% ≥ median</b><br><b>(n=58)</b> | <b><i>p</i></b> |
| Ht %                                   | 32.70 (8.45)                              | 30.85 (7.4)                            | 0.0615          |
| Total plasma proteins (g/L)            | 75.70 (16.65)                             | 86.45 (29.22)                          | 0.0033          |
| cWBV 208 sec <sup>-1</sup> (mPa · sec) | 16.69 (3.29)                              | 18.29 (4.83)                           | 0.0057          |
| Fibrinogen (g/L)                       | 3.260 (1.325)                             | 3.190 (1.255)                          | 0.9021          |
| Albumin (g/L)                          | 37.90 (10.00)                             | 35.55 (9.25)                           | 0.1711          |
| Albumin/Fibrinogen ratio               | 10.52 (6.082)                             | 10.28 (5.54)                           | 0.6471          |

IQR = interquartile range; MM = multiple myeloma; BMPC = bone marrow plasma cell; LCMM= Light chain multiple myeloma; Ht = hematocrit; cWBV = calculated whole-blood viscosity.
